# Supplementary material
Source: publisher figshare collection journal article supplement (https://karger.figshare.com/articles/dataset/_/5121352)
Supplement: Supplementary file 1 [file 1]

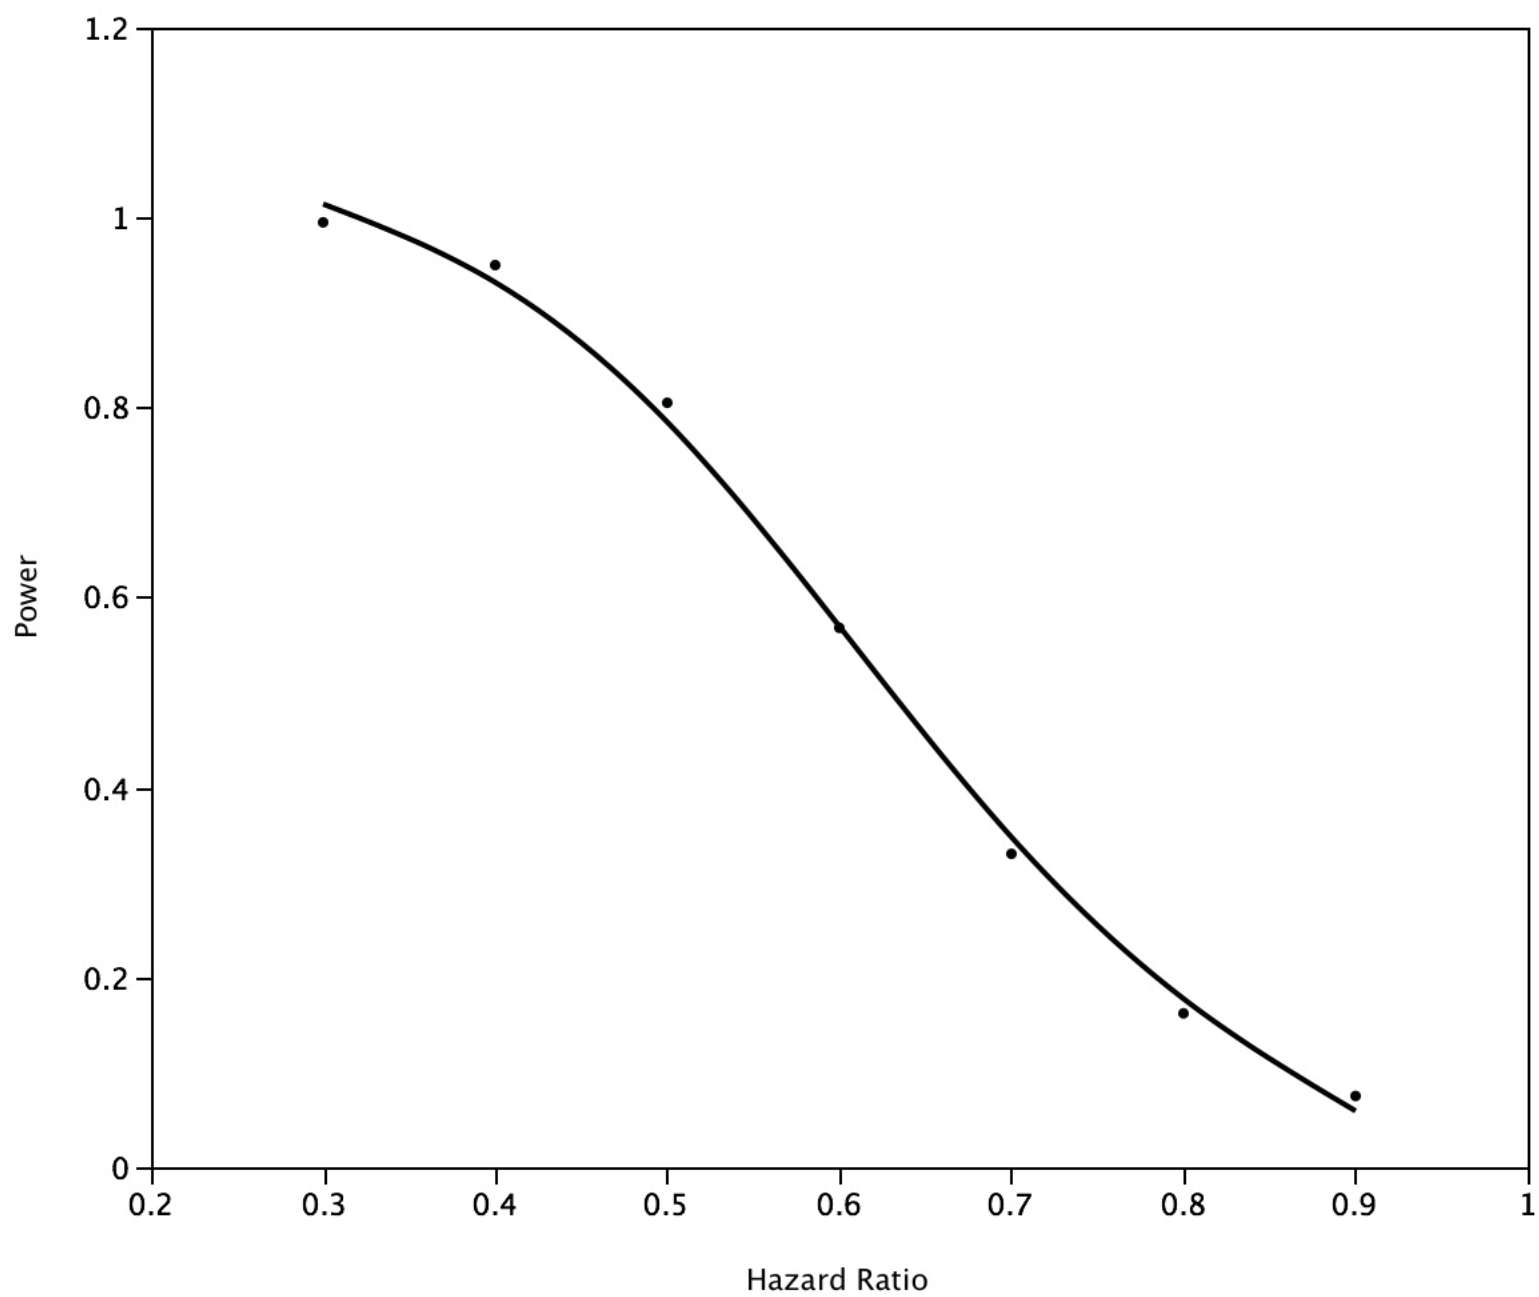

Supplementary Figure S1: Power analysis, showing power using sample size of 50 in each arm and a survival of 68% at one year in the control arm
