# Supplementary material
Source: publisher figshare collection journal article supplement (https://karger.figshare.com/articles/dataset/_/5121352)
Supplement: Supplementary file 2 [file 1]

**Supplementary Table S1.** Number needed to treat (NNT) to prevent one death when Hazard ratio is 0.40 (95% CI, 0.19, 0.82)

| Follow up (years) | Cumulative Mortality (%) | NNT  | 95% CI      |
|-------------------|--------------------------|------|-------------|
| 1                 | 32.5                     | 3.20 | 2.07, 13.72 |
| 2                 | 45.53                    | 3.64 | 2.46, 14.44 |
| 3                 | 54.25                    | 4.16 | 2.88, 15.84 |
| 4                 | 66.72                    | 5.45 | 3.86, 19.84 |
| 5                 | 66.72                    | 5.45 | 3.86, 19.84 |
| 6                 | 73.38                    | 6.68 | 4.78, 23.79 |
| 7                 | 73.38                    | 6.68 | 4.78, 23.79 |

**Supplementary Table S2:** Power analysis, showing power of the study given n = 50 in each group and a one year survival of 68 %

| Hazard Ratio | Power |
|--------------|-------|
| 0.3          | 0.995 |
| 0.4          | 0.95  |
| 0.5          | 0.805 |
| 0.6          | 0.568 |
| 0.7          | 0.330 |
| 0.8          | 0.162 |
| 0.9          | 0.075 |
